# Supplementary material for: Implementing opportunistic spectrum access in LTE-advanced
Source: Springer Nature journal article supplement (doi:10.1186/1687-1499-2012-99), 2012-03-09
Supplement: 13638_2011_270_MOESM2_ESM.pdf [file 13638_2011_270_MOESM2_ESM.pdf]

# Primary User Presence

Primary User Present

Primary User Absent

Primary User Detection

Primary User  
Detected

Detected

Correct  
Detection

False Alarm  
(False Positive)

Primary User  
Not Detected

Not Detected

Missed Detection  
(False Negative)

Correct  
Non-detection
