# Supplementary material for: Implementing opportunistic spectrum access in LTE-advanced
Source: Springer Nature journal article supplement (doi:10.1186/1687-1499-2012-99), 2012-03-09
Supplement: 13638_2011_270_MOESM10_ESM.pdf [file 13638_2011_270_MOESM10_ESM.pdf]

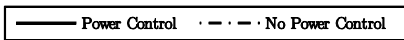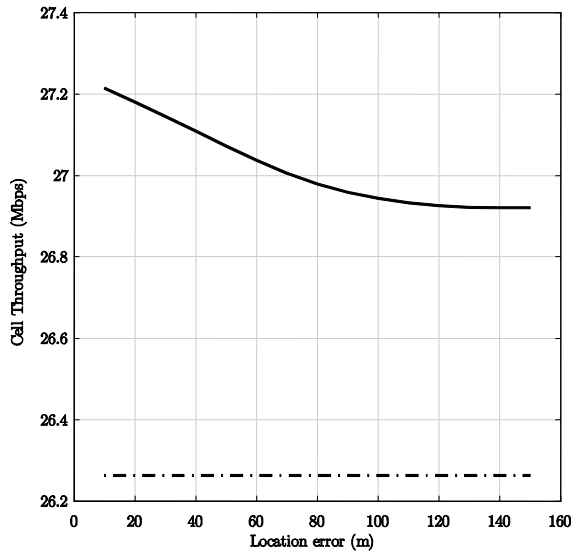

(a)

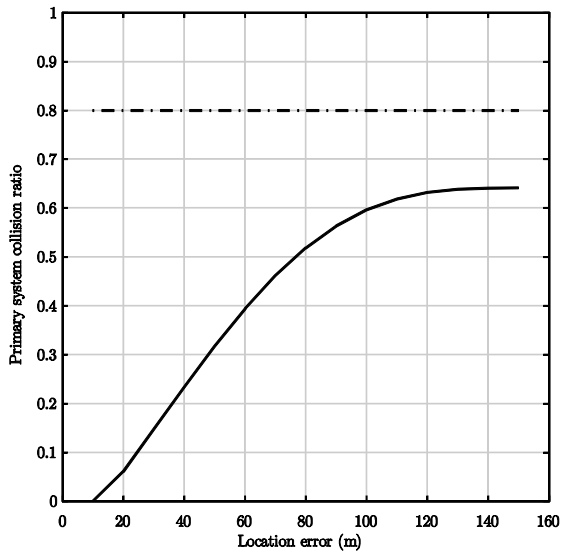

(b)
